# Supplementary material for: The History of Infectious Diseases and Medicine
Source: MDPI journal article supplement (doi:10.3390/pathogens11101147), 2022-10-04
Supplement: s1 [file s1]

## The medical publications and textbooks in the five historical periods

### 1. Classic Western medicine (Ancient times to the 15th century)

#### 1.1. Hippocratic Corpus

Around seventy documents associated with him and his students were assembled to form the so-called Hippocratic Corpus (Latin: *Corpus Hippocraticum*), including the *Epidemiai* (ἐπιδημιαί) volumes I-VII. The title word “*Epidemiai*” does not indicate our current understanding of the word “epidemic,” but merely indicates visits to a distant place or person, related to seasonal outbreaks of disease, or the lengthy sojourns made by itinerant doctors<sup>1</sup>. Some terms in the Hippocratic Corpus may appear to represent infectious diseases in the modern sense, but a careful reading would show that their meanings are actually equivocal. For example, the word ‘plague’ (λοιμός) represented diseases with high mortality in general, ‘cholera’ (χόλερα) the symptoms of diarrhea and vomiting at the same time, and ‘dysentery’ (δυσεντερία) the symptoms of frequent watery stools containing blood and mucus. This was long before the discovery of infectious pathogens, and the concept of infectious diseases had yet to be invented.

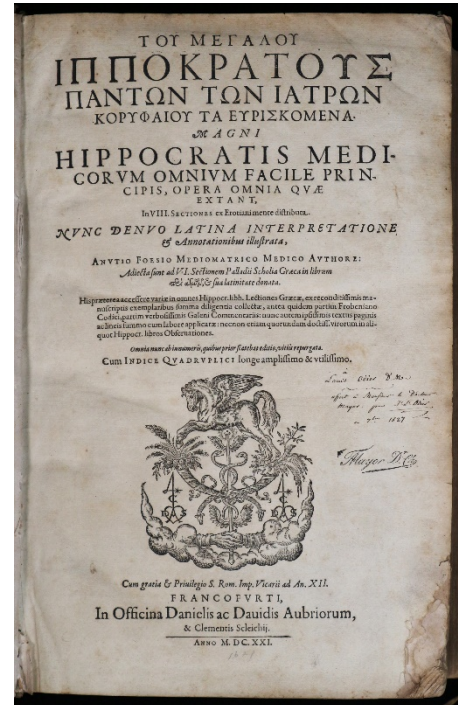

Upright figure.

“Hippocratic corpus” (1621). Personal collection of Tatsuo Sakai.

#### 1.2. Galen's treatises

Galen of Pergamon wrote numerous treatises on various aspects of medicine including general medicine, natural sciences (physics), anatomy, physiology, dietetics, pathology, semeiotics, and pharmaceuticals. His treatises were widely adopted and regarded as authoritative into the Middle Ages and the Renaissance, earning him the title of “the Prince of Medicine.”<sup>2</sup> He witnessed the Antonine Plague during his stay in Rome. The described the symptoms in his *Method of Medicine*, V.12, which is today which is today considered smallpox<sup>3</sup>.

Upright figure.

Galen “Opera omnia” (1625). Personal collection of Tatsuo Sakai.

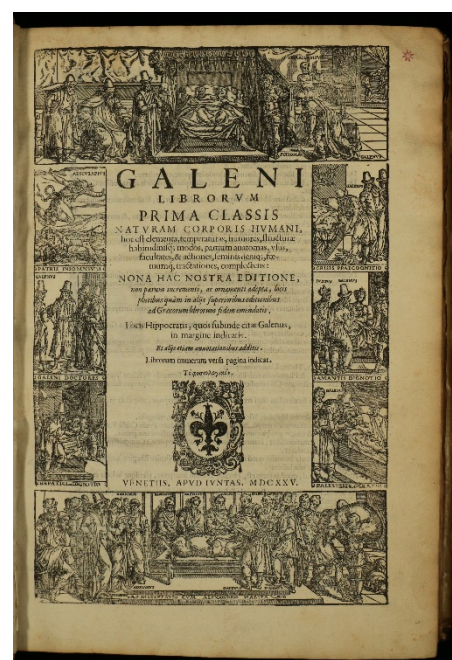

### 1.3. Classic medical textbooks in the middle ages

After the division and decline of the Roman Empire in 395, the Galenic treatises were translated into Syriac and Arabic and transmitted to the Orient, other medical works such as Avicenna's encyclopedic *Liber Canonis* (*Canon of Medicine*) were compiled by the synthetic exposition of classical Greek medicine.

At the Schola Medica Salernitana beginning from the later 10th century compiled a teaching material *Articella* incorporating Hippocratic, Galenic and other documents translated from Arabic and Greek texts.

Upright figure.

Avicenna "Liber canonis" (1544).

Personal collection of Tatsuo Sakai.

*Articella* (1534). Personal collection of Tatsuo Sakai.

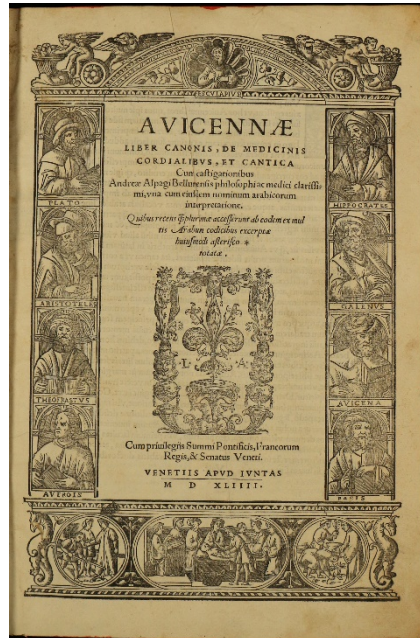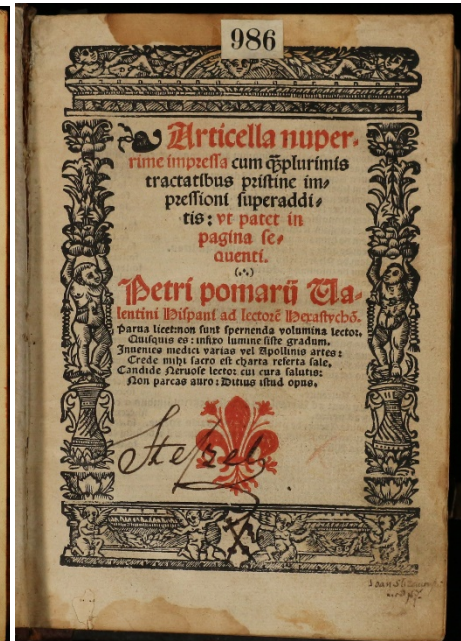

## 2. Traditional Western medicine in the 16th to 18th centuries

### 2.1. Vesalius "Fabrica" and following anatomical studies

Andreas Vesalius's *De humani corporis fabrica* (On the structure of the human body, 1543) is the outstanding medical literature in this period. His seven-volume work reexamined the description of Galenic anatomy with human dissection and visualized the human body structures with numerous precise anatomical drawings. The publication of *Fabrica* was revolutionary in that it introduced a shift away from the hitherto target of medical studies to better understand the classical medical texts to the new scientific investigation of phenomena in nature including the human body.

Thereafter anatomical research brought about numerous discoveries, notably new findings on blood circulation by William Harvey (*Exercitatio anatomica de motu cordis et sanguinis in animalibus*, 1628), on the lymphatic system by Thomas Bartholin (*Vasa lymphatica*, 1653) and on the brain structure by Thomas Willis (*Cerebri anatome*, 1664)<sup>4</sup>.

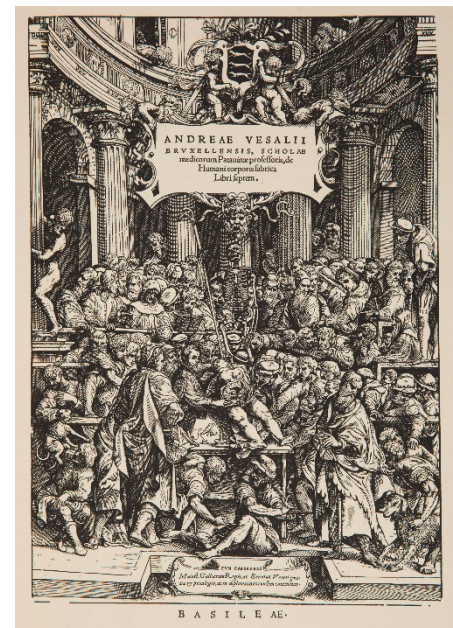

Upright figure.

Title page of Vesalius "Fabrica" (1543), from "Icones Anatomicae" (1934). Personal collection of Tatsuo Sakai.



2.2. Infectious diseases in the *Practica* books

Daniel Sennert's *De febribus libri IV* (1619)<sup>5</sup>. In *De febribus libri IV*, a malaria-like intermittent fever was described in book two "Of the putrid fevers", and small pox and measles in book four "Of the pestilence, and the pestilential and malignant fevers".

Daniel Sennert's *Practicae medicinae* in 6 vols. (1628-1635)<sup>6</sup>. book three, part two described dysentery as an abdominal illness, and book six, part three was devoted to the topic "Of occult diseases from water, air, and contagions, and of contagious diseases in general" and part four to that "Of the venereal pox".

Upright figure.

Sennert D "Operum" (1676) including *Practica*. Personal collection of Tatsuo Sakai.

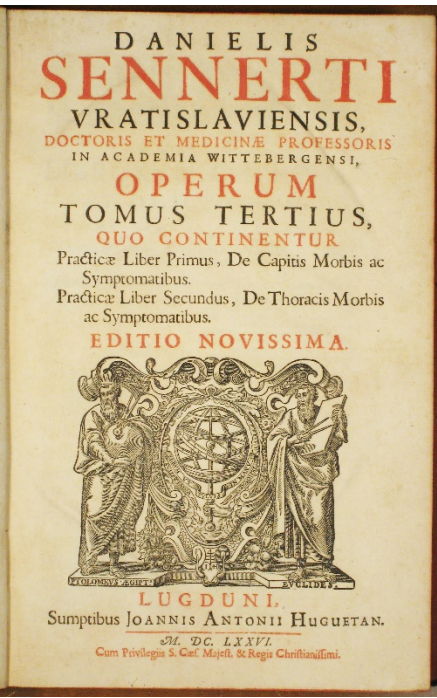

**Table S1.** Sennert J "De febribus libri IV" (1619), "Practicae medicinae" 6 vols. (1628-1635)

| "De febribus libri IV" (1619)             |                                                                                        |
|-------------------------------------------|----------------------------------------------------------------------------------------|
| Book 1                                    | Of the fevers in general and ephemerical fevers                                        |
| Book 2                                    | Of the putrid fevers                                                                   |
| Book 3                                    | Of the hectic fevers                                                                   |
| Book 4                                    | Of the pestilence, and the pestilential and malignant fevers.                          |
| "Practicae medicinae" 6 vols. (1628-1635) |                                                                                        |
| Book 1 (1628)                             |                                                                                        |
| Part 1                                    | On the diseases of the head                                                            |
| Part 2                                    | On the symptoms that occur in the internal senses and in the brain                     |
| Part 3                                    |                                                                                        |
| Section 1                                 | On the injured touch.                                                                  |
| Section 2                                 | On the disease and symptoms of the eye                                                 |
| Section 3                                 | On the disease and symptoms of the ears                                                |
| Section 4                                 | On the disease and symptoms of the nose                                                |
| Section 5                                 | On the disease and symptoms of the tongue                                              |
| Book 2 (1629)                             |                                                                                        |
| Part 1                                    | On the mouth and throat, and the parts contained in these fields.                      |
| Part 2                                    | On the unnatural affections of the trachea, lungs, mediastinum, diaphragm, and thorax. |
| Part 3                                    | On the symptoms that affect the lungs and the chest.                                   |
| Part 4                                    | On the diseases and symptoms of the heart.                                             |

**Table S1. Continued**

|                                     |                                                                                                        |
|-------------------------------------|--------------------------------------------------------------------------------------------------------|
| Book 3 (1631)                       |                                                                                                        |
| Part 1                              |                                                                                                        |
| Section 1                           | On the diseases of the esophagus and the stomach                                                       |
| Section 2                           | On the symptoms of the stomach                                                                         |
| Part 2                              |                                                                                                        |
| Section 1                           | On the diseases of the intestines                                                                      |
| Section 2                           | On the symptoms that affect the intestines.                                                            |
| Part 3                              | On the diseases of the mesentery, pancreas and omentum                                                 |
| Part 4                              | On the unnatural affections of the spleen                                                              |
| Part 5                              |                                                                                                        |
| Section 1                           | On the hypochondriac affections.                                                                       |
| Section 2                           | On the scurvy                                                                                          |
| Part 6                              |                                                                                                        |
| Section 1                           | On the diseases of the liver                                                                           |
| Section 2                           | On the symptoms that occur to the liver                                                                |
| Part 7                              |                                                                                                        |
| Section 1                           | On the diseases of the kidneys and ureters.                                                            |
| Section 2                           | On the symptoms of the kidneys.                                                                        |
| Part 8                              |                                                                                                        |
| Section 1                           | On the diseases of the bladder                                                                         |
| Section 2                           | On the symptoms of the bladder                                                                         |
| Part 9                              |                                                                                                        |
| Section 1                           | On the diseases of the genital parts in men                                                            |
| Section 2                           | On the symptoms that occur in the genital organs and during generation in men                          |
| Part 10                             | On the unnatural affections of the navel and abdomen                                                   |
| Book 4 (1632)                       |                                                                                                        |
| Part 1                              |                                                                                                        |
| Section 1                           | Of the diseases of the pudenda and the cervix of uterus in women                                       |
| Section 2                           | Of the diseases of the uterus itself                                                                   |
| Part 2                              |                                                                                                        |
| Section 1                           | Of the symptoms that occur in the uterus in women.                                                     |
| Section 2                           | On the symptoms that occur during menstruation, and other unnatural discharges from the uterus.        |
| Section 3                           | On the symptoms, that befall almost all virgins and women after puberty in the uterus.                 |
| Section 4                           | On the symptoms that occur during pregnancy                                                            |
| Section 5                           | On the government of the pregnant women, and the unnatural affections which affect the pregnant women. |
| Section 6                           | On the symptoms that occur at birth.                                                                   |
| Section 7                           | On the government of puerperants, and the unnatural affections which occur to them after childbirth.   |
| Part 3                              |                                                                                                        |
| Section 1                           | On the unnatural affections of the breasts                                                             |
| Section 2                           | On the diseases of the breasts                                                                         |
| Section 2                           | On the symptoms of the breasts                                                                         |
| Treatise on the diseases of infants |                                                                                                        |
| Part 1                              | Of the diet and government of infants                                                                  |
| Part 2                              | Of diseases and symptoms of children                                                                   |
| Book 5 (1634)                       |                                                                                                        |
| Part 1                              | Of tumors                                                                                              |
| Part 2                              | Of ulcers                                                                                              |
| Part 3                              |                                                                                                        |
| Section 1                           | Of the vices of the skin, hair, and nails                                                              |
| Section 2                           | Of the vices of the skin                                                                               |
| Section 2                           | Of things amiss in the hair and nails                                                                  |
| Part 4                              | Of wounds                                                                                              |
| Part 5                              | Of fractures                                                                                           |
| Part 6                              | Of luxations                                                                                           |

**Table S1.** Continued

|               |                                                                                           |
|---------------|-------------------------------------------------------------------------------------------|
| Book 6 (1635) |                                                                                           |
| Part 1        | Of diseases from occult qualities in general                                              |
| Part 2        | Of occult, malignant, and venomous diseases arising from the internal fault of the humors |
| Part 3        | Of occult diseases from water, air, and contagions, and of contagious diseases in general |
| Part 4        | Of the venereal pox                                                                       |
| Part 5        | Of outward poisons in general                                                             |
| Part 6        | Of poisons from minerals and metals                                                       |
| Part 7        | Of poisons from plants                                                                    |
| Part 8        | Of poisons that come from animals                                                         |
| Part 9        | Of diseases by witchcraft, incantation, and charms                                        |

A supplemental document describing the detail of each section is available at the following link.

<https://doi.org/10.6084/m9.figshare.19246044.v1>

### 3. Early Modern Medicine (19th century)

Niemeyer’s *Lehrbuch der speciellen Pathologie und Therapie* (1858)<sup>7</sup> was the most popular textbook of medicine in the middle third of the 19th century. It dealt mainly with the diseases of various organs, and recognized various acute and chronic infectious diseases in the section of “constitutional diseases” (volume 2, part 2, section 3).

Upright figure.

Niemeyer F “*Lehrbuch der speciellen Pathologie und Therapie*” (1858).

Personal collection of Tatsuo Sakai

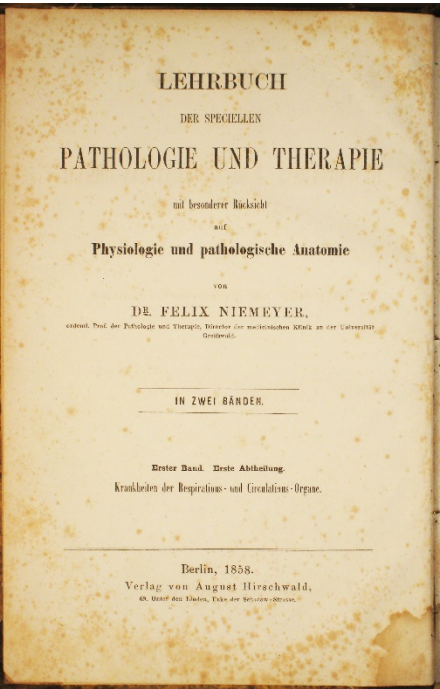

**Table S2.** Niemeyer F “*Lehrbuch der speciellen Pathologie und Therapie*” (1858-61)

|                                    |                                                                                                                      |
|------------------------------------|----------------------------------------------------------------------------------------------------------------------|
| Volume 1 (1858)                    |                                                                                                                      |
| Part 1                             | The diseases of the respiratory and circulatory organs with special reference to physiology and pathological anatomy |
| Diseases of the respiratory organs |                                                                                                                      |
| Section 1                          | Diseases of the larynx                                                                                               |
| Section 2                          | Diseases of the trachea and bronchi                                                                                  |
| Section 3                          | Diseases of the pulmonary parenchyme                                                                                 |
| Section 4                          | Diseases of the pleura                                                                                               |
| Diseases of the circulatory organs |                                                                                                                      |
| Section 1                          | Diseases of the heart                                                                                                |
| Section 2                          | Diseases of the pericardium                                                                                          |
| Section 3                          | Diseases of the great vessels                                                                                        |

**Table S2. Continued**

|                                      |                                                                                                                              |
|--------------------------------------|------------------------------------------------------------------------------------------------------------------------------|
| Part 2                               | The diseases of the digestive organs, the liver and the spleen with special reference to physiology and pathological anatomy |
| Diseases of the digestive organs     |                                                                                                                              |
| Section 1                            | Diseases of the oral cavity                                                                                                  |
| Section 2                            | Diseases of the pharynx                                                                                                      |
| Section 3                            | Diseases of the esophagus                                                                                                    |
| Section 4                            | Diseases of the stomach                                                                                                      |
| Section 5                            | Diseases of the intestinal canals                                                                                            |
| Section 6                            | Diseases of the peritoneum                                                                                                   |
| Diseases of the liver and bile ducts |                                                                                                                              |
| Section 1                            | Diseases of the liver                                                                                                        |
| Section 2                            | Diseases of the bile ducts                                                                                                   |
| Section 3                            | Diseases of the spleen                                                                                                       |

---

|                                |                                                                                                                                                |
|--------------------------------|------------------------------------------------------------------------------------------------------------------------------------------------|
| Volume 2 (1861)                |                                                                                                                                                |
| Part 1                         | The diseases of the urinary and genital organs, the nerve centers and the nerves with special reference to physiology and pathological anatomy |
| Diseases of the urinary organs |                                                                                                                                                |
| Section 1                      | Diseases of the kidney                                                                                                                         |
| Section 2                      | Diseases of the renal pelvis and ureter                                                                                                        |
| Section 3                      | Diseases of the urinary bladder                                                                                                                |
| Section 4                      | Diseases of the urethra                                                                                                                        |
| Diseases of the genital organs |                                                                                                                                                |
| A                              | Diseases of the male genital organs                                                                                                            |
| B                              | Diseases of the female genital organs                                                                                                          |
| Section 1                      | Diseases of the ovary                                                                                                                          |
| Section 2                      | Diseases of the uterus                                                                                                                         |
| Section 3                      | Diseases of the vagina                                                                                                                         |
| Diseases of the nervous system |                                                                                                                                                |
| Section 1                      | Diseases of the brain                                                                                                                          |
| Section 2                      | Diseases of the spinal cord and its coat                                                                                                       |
| Section 3                      | Diseases of the peripheral nerves                                                                                                              |
| Section 4                      | Expanded neurosis with unknown anatomical basis                                                                                                |

---

|                                  |                                                                                                                                              |
|----------------------------------|----------------------------------------------------------------------------------------------------------------------------------------------|
| Part 2                           | The diseases of the skin, the locomotor organs and the constitutional diseases with special reference to physiology and pathological anatomy |
| Diseases of the skin             |                                                                                                                                              |
| Diseases of the locomotor organs |                                                                                                                                              |
| Constitutional diseases          |                                                                                                                                              |
| Section 1                        | Acute infectious diseases                                                                                                                    |
| Section 2                        | Chronic infectious diseases                                                                                                                  |
| Section 3                        | General nutritional abnormalities that do not depend on an infection                                                                         |

A supplemental document describing the detail of each section is available at the following link.

<https://doi.org/10.6084/m9.figshare.19246047.v2>

4. Late Modern Medicine (20th century)

Osler, William (1849-1919) was the most prominent physician in the early 20th century, and his *Principles and Practice of Medicine* (1st ed. 1892, 9th edition, 1920)<sup>9</sup> was the best English work on medicine of its time. The infectious diseases were allotted to a separate and the first section of the textbook.

Upright figure.

Osler W “Principles and Practice of Medicine” (1892). Personal collection of Tatsuo Sakai

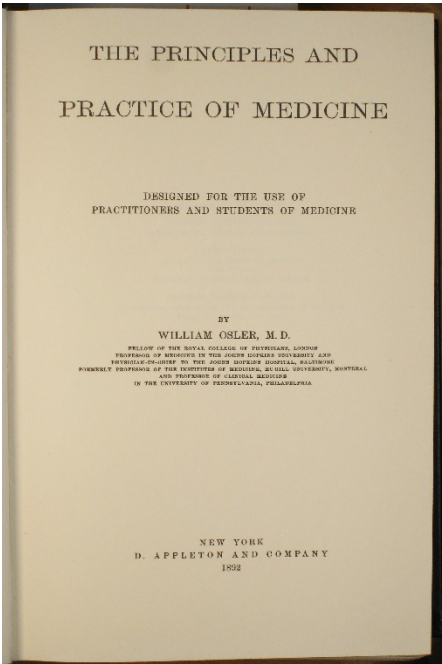

**Table S3.** Osler W “The principles and practice of medicine” (1892)

|            |                                            |
|------------|--------------------------------------------|
| Section 1  | Specific infectious diseases.              |
| Section 2  | Constitutional diseases.                   |
| Section 3  | Diseases of the digestive system.          |
| Section 4  | Diseases of the respiratory system.        |
| Section 5  | Diseases of the circulatory system.        |
| Section 6  | Diseases of the blood and ductless glands. |
| Section 7  | Diseases of the kidneys.                   |
| Section 8  | Diseases of the nervous system.            |
| Section 9  | Diseases of the muscles.                   |
| Section 10 | The intoxications; Sun-stroke; Obesity.    |
| Section 11 | Diseases due to animal parasites.          |

A supplemental document describing the detail of each section is available at the following link.

<https://doi.org/10.6084/m9.figshare.19246050.v2>

## 5. Exact Medicine (1990 - to date)

*Harrison's Principles of Internal Medicine*, 20th edition (2018) <sup>10</sup>

**Table S4.** Harrison's Principles of Internal Medicine, 20e (2018)

|         |                                                            |
|---------|------------------------------------------------------------|
| Part 1  | The Profession of Medicine                                 |
| Part 2  | Cardinal Manifestations and Presentation of Diseases       |
| Part 3  | Pharmacology                                               |
| Part 4  | Oncology and Hematology                                    |
| Part 5  | Infectious Diseases                                        |
| Part 6  | Disorders of the Cardiovascular System                     |
| Part 7  | Disorders of the Respiratory System                        |
| Part 8  | Critical Care Medicine                                     |
| Part 9  | Disorders of the Kidney and Urinary Tract                  |
| Part 10 | Disorders of the Gastrointestinal System                   |
| Part 11 | Immune-Mediated, Inflammatory, and Rheumatologic Disorders |
| Part 12 | Endocrinology and Metabolism                               |
| Part 13 | Neurologic Disorders                                       |
| Part 14 | Poisoning, Drug Overdose, and Envenomation                 |
| Part 15 | Disorders Associated with Environmental Exposures          |
| Part 16 | Genes, the Environment, and Disease                        |
| Part 17 | Global Medicine                                            |
| Part 18 | Aging                                                      |
| Part 19 | Consultative Medicine                                      |
| Part 20 | Frontiers                                                  |
| Part 21 | Video Collection                                           |
| Part 22 | Supplementary Topics                                       |
| Part 23 | Atlases                                                    |
| Part 24 | Clinical Procedure Tutorials                               |



## References

1. Craik EM, Hippocrates. The 'Hippocratic' corpus: content and context. Abingdon, Oxon; New York, NY: Routledge; 2015.
2. Mattern SP. The Prince of Medicine : Galen in the Roman Empire. Oxford: Oxford University Press; 2013.
3. Duncan-Jones RP. The impact of the Antonine plague. *Journal of Roman Archaeology*. 1996;9:108-36. Epub 2015/02/16.
4. Persaud TVN. A history of anatomy: The post-Vesalian era. Springfield IL: Charles C Thomas Publisher; 1997.
5. Sennert D. De febribus libri IV. Wittebergae: apud Zachariam Schurerum; 1619.
6. Sennert D. Practicae medicinae liber primus-sexthus. Wittebergae: Sumtibus viduae et haered. Zachariae Schureri senioris; 1628-1635.
7. Niemeyer F. Lehrbuch der speciellen Pathologie und Therapie, mit besonderer Rücksicht auf Physiologie und pathologische Anatomie. Berlin: Hirschwald; 1858-61.
8. Fracastoro G. De sympathia et antipathia rerum liber unus. De contagione et contagiosis morbis et curatione libri iii. Venetiis: apud heredes Lucaeantonii Juntae Florentini; 1546.
9. Osler W. The principles and practice of medicine. New York, NY: D. Appleton & Company; 1892.
10. Jameson JL FA, Kasper DL, Hauser SL, Longo DL, Loscalzo J (ed). Harrison's principles of internal medicine. 20th ed. New York: McGraw-Hill; 2018.
